# Supplementary material
Source: PubMed Central journal article supplement (PMC9188756)
Supplement: develop-149-200355-s1.pdf [file develop-149-200355-s1.pdf]

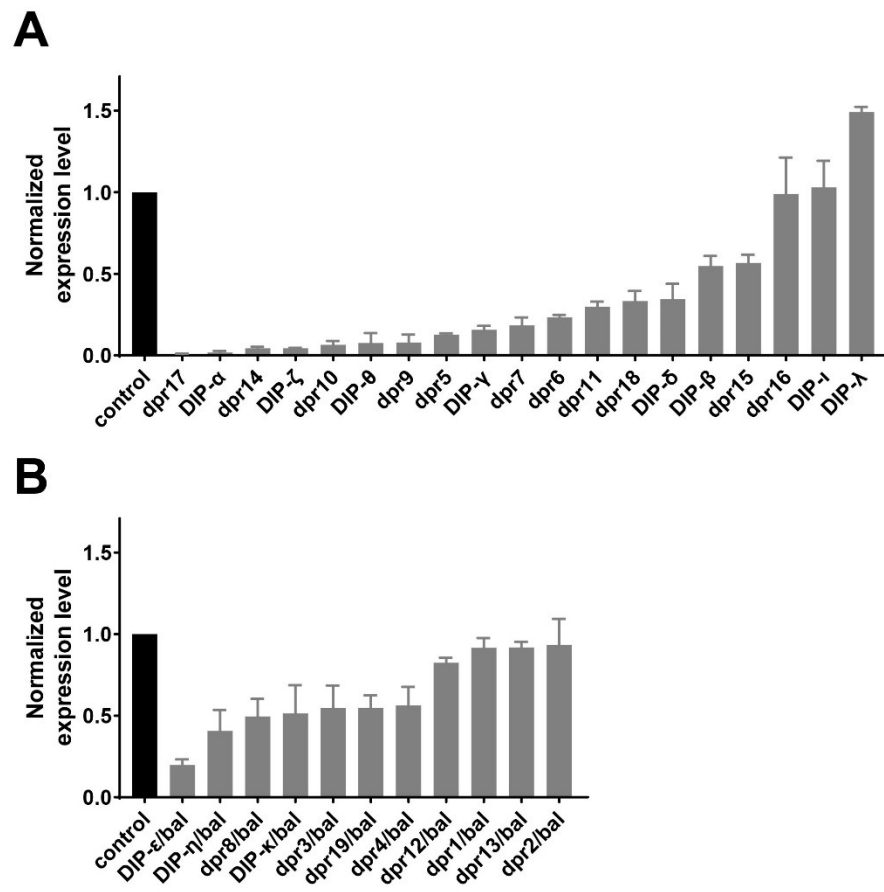

**Fig. S1. Respective mRNA level in *dpr/DIP-GAL4* lines.**

A. qRT-PCR results of homozygous viable *dpr/DIP-GAL4* lines. mRNA levels were double normalized to control animal and Rpl32 internal control.

B. qRT-PCR results of homozygous lethal *dpr/DIP-GAL4* lines. mRNA levels were double normalized to control animal and Rpl32 internal control.

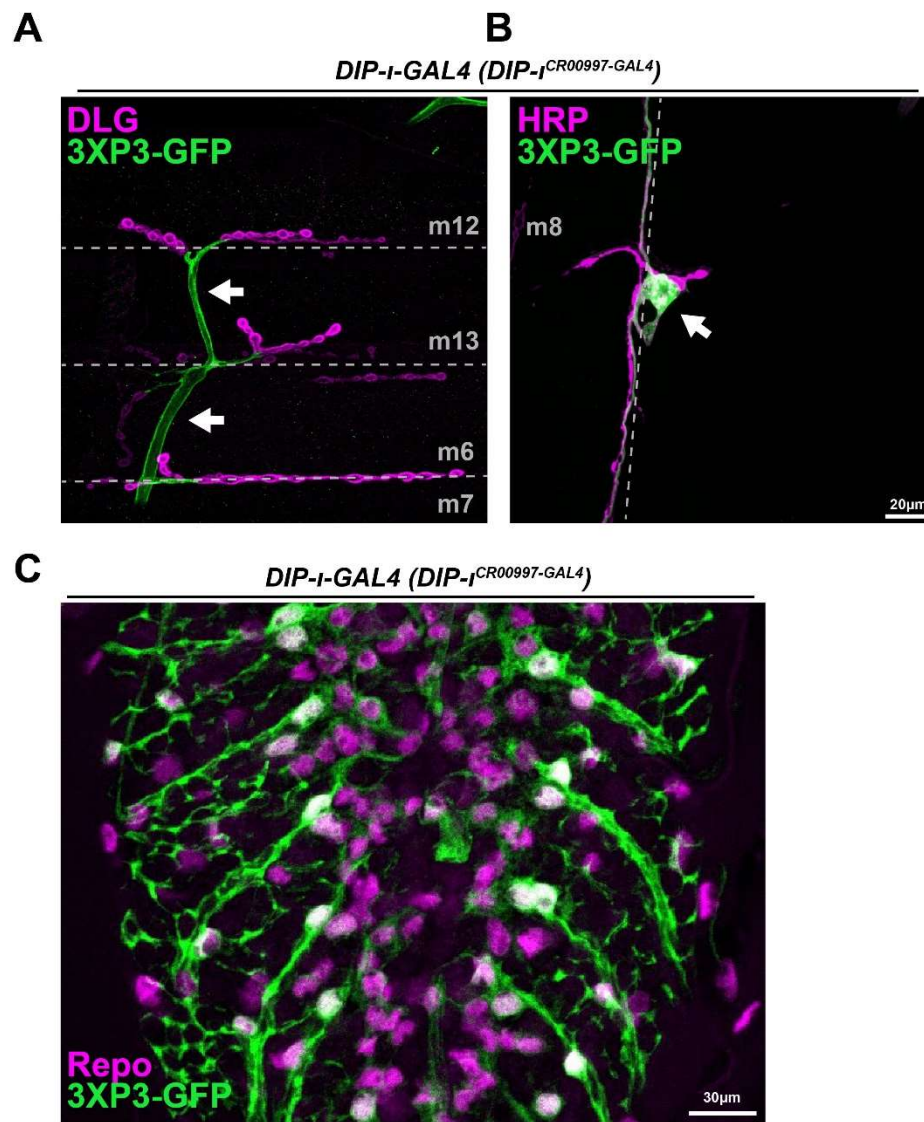

**Fig. S2. Expression of CRIMIC 3XP3-GFP in nervous system.**

A-B. Representative images showing the expression of 3XP3-GFP in peripheral glial cells (arrow) and the lbd SN (arrow).

C. Representative image showing the expression of 3XP3-GFP in some glial cells in the VNC.

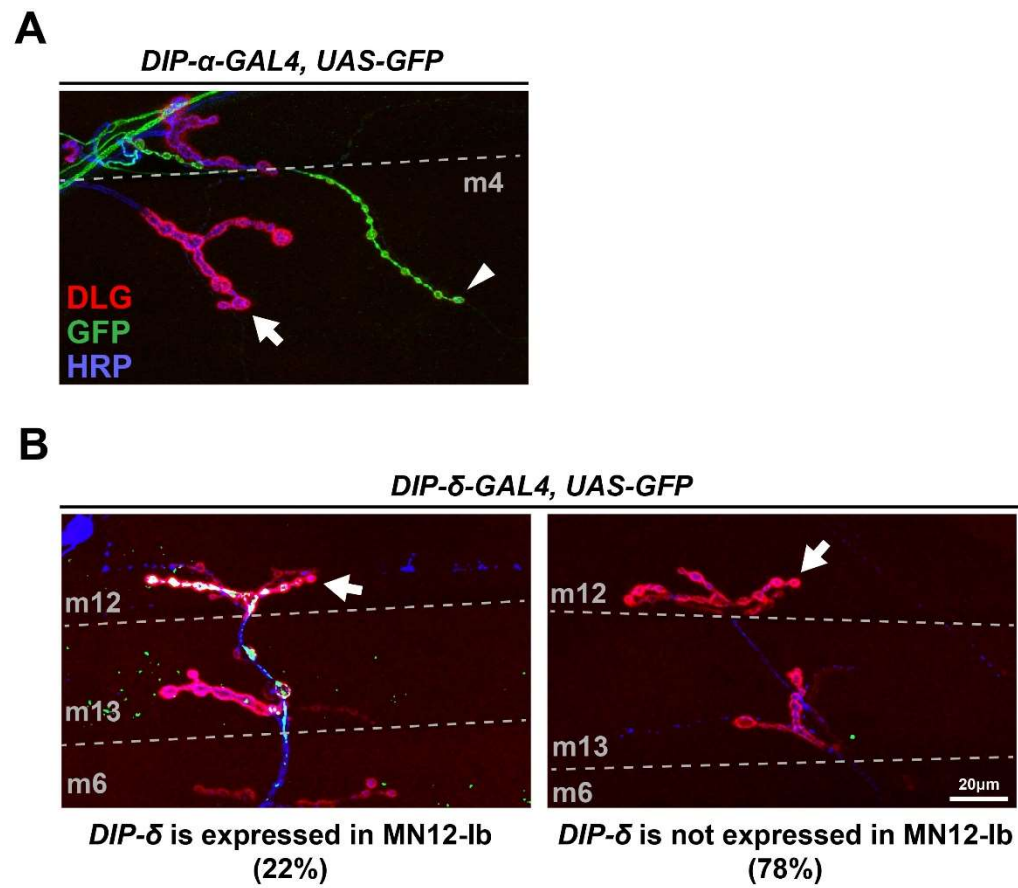

**Fig. S3. Expression of *DIP- $\alpha$*  and *DIP- $\delta$*  in MNs.**

A. Representative image showing the expression of *DIP- $\alpha$*  in Is MNJ (arrowhead) but not in adjacent Ib NMJ (arrow).

B. Representative images showing the varied expression of *DIP- $\delta$*  in MN12-lb (arrow). Note that 22% MN12-lb express *DIP- $\delta$*  (left) whereas 78% do not express (right).

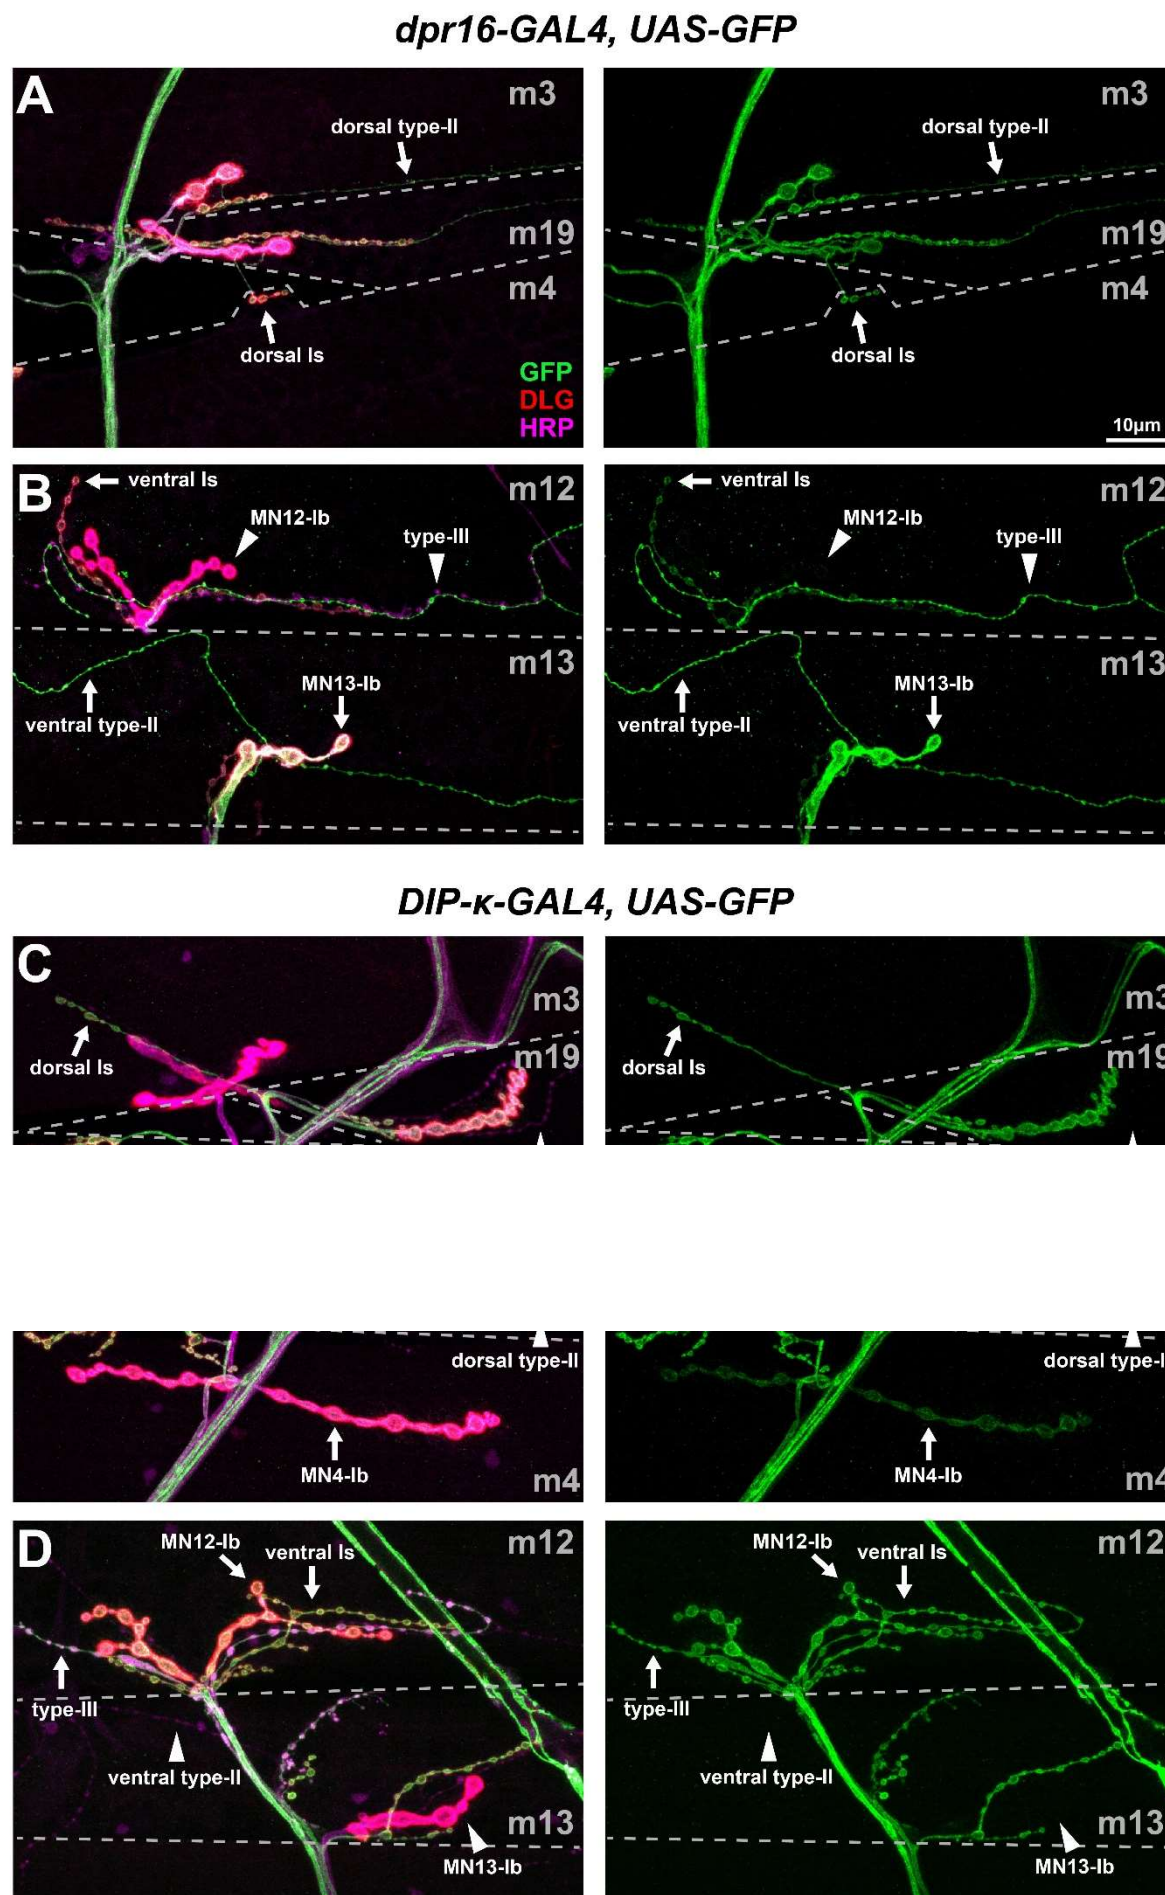

**Fig. S4. Expression of *dpr16* and *DIP-k* in type-II and type-III MNs.**

A-B. Representative images showing the expression of *dpr16* in dorsal and ventral type-II MNs, dorsal and ventral Is MNs and MN13-lb (arrows), but not in MN12-lb and type-III MN (arrowheads).

C-D. Representative images showing the expression of *DIP-k* in dorsal and ventral Is MNs, MN4-lb, MN12-lb and type-III MN (arrows), but not in dorsal and ventral type-II MNs (arrowheads).

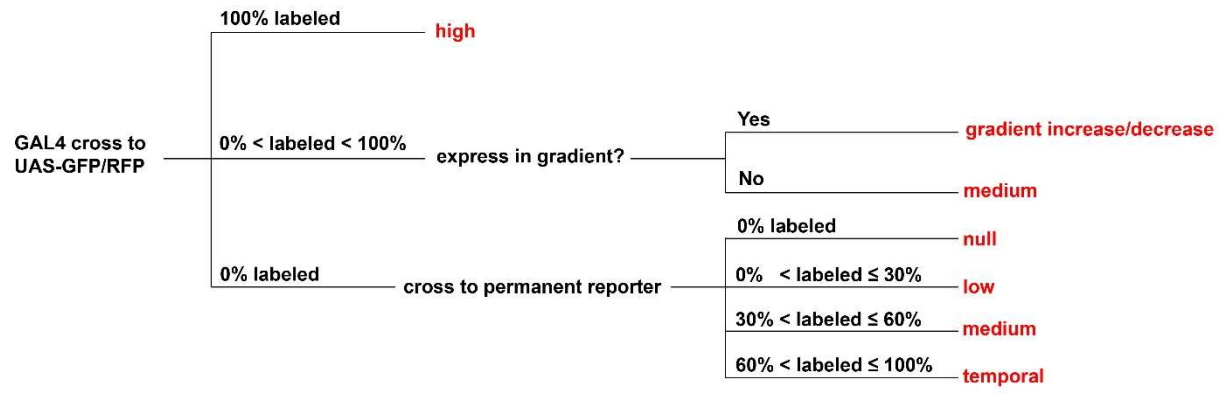

**Fig. S5. Criteria to determine the expression of GAL4 in a certain MN/SN.**

A graphical flow chart depicting how we scored the *dpr/DIP* expression data into categories.



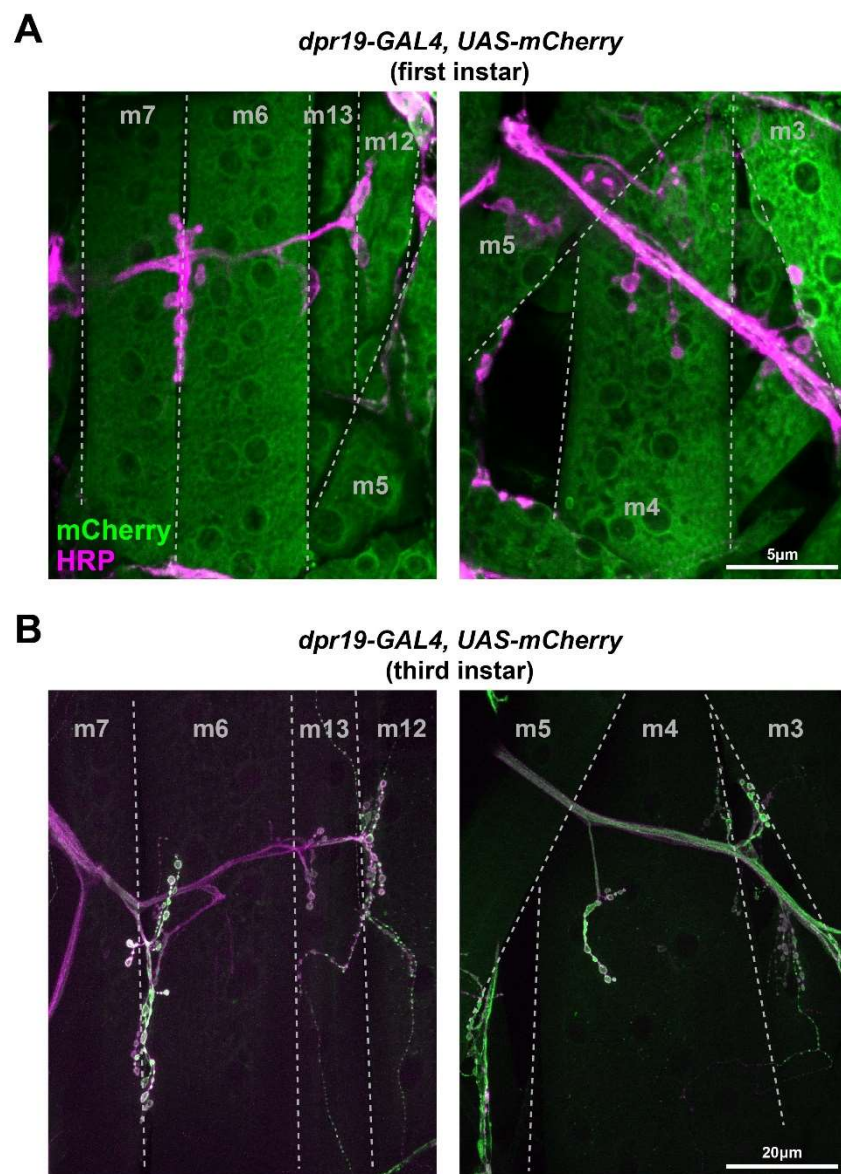

**Fig. S6. *dpr19* is expressed in muscles in early larval development.**

A. Representative images of *dpr19-GAL4>mCherry* in first instar larvae. *dpr19* is expressed in ventral (left) and dorsal (right) muscles.

B. Representative images of *dpr19-GAL4>mCherry* in third instar larvae. *dpr19* is not expressed in ventral (left) or dorsal (right) muscles.

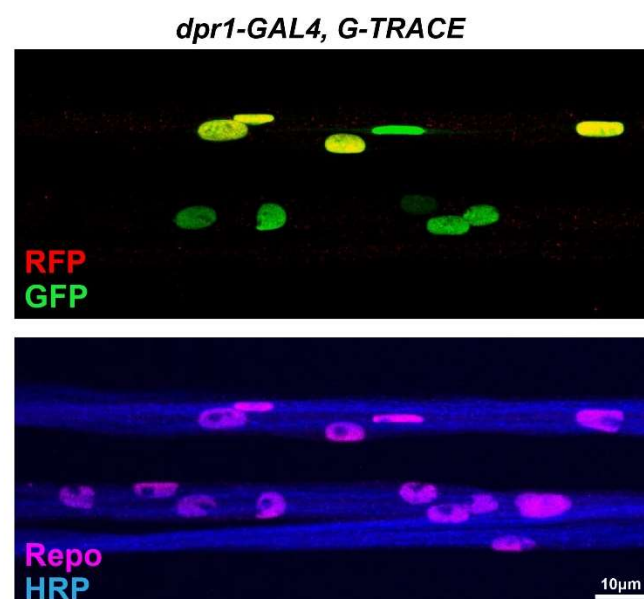

**Fig. S7. The G-TRACE system revealed *dpr1* expression in peripheral glial cells.** *dpr1* is the only *dpr/DIP* expressed in peripheral glial cells. *dpr1-GAL4* is expressed in subsets of peripheral glial cells as indicated by some glial nuclei labeled by both GFP and RFP, some only by GFP, and some lacking both GFP and RFP.

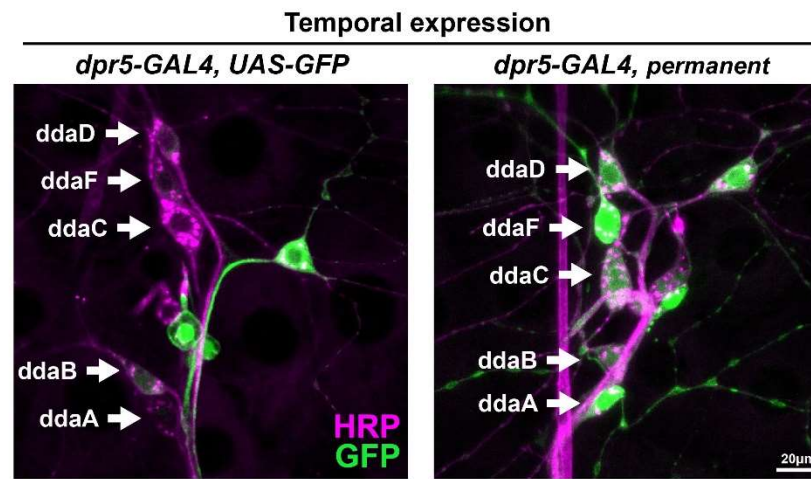

**Fig. S8. Temporal expression of *dpr5* in the dorsal da neuron cluster.**

*ddaA*, *ddaC*, *ddaF* and *ddaD* are not labeled in *dpr5-GAL4>GFP* larvae but are robustly labeled in the cross to the permanent reporter. Therefore, *dpr5* is temporally expressed in these SNs. *ddaB* is labeled in the cross to the real-time reporter with a low frequency, thus *dpr5* is considered as low expression in *ddaB*.

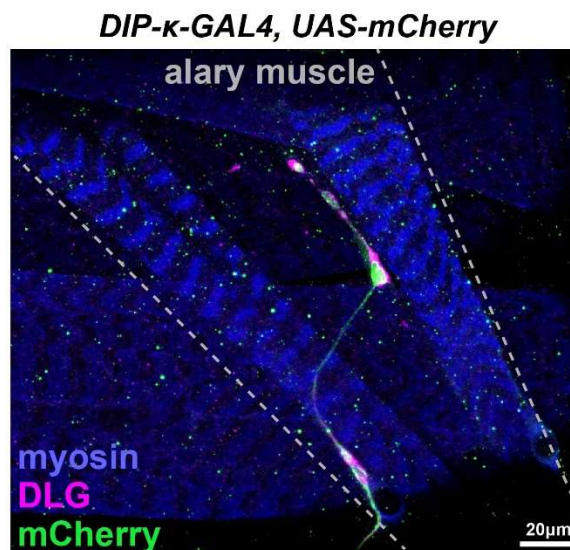

**Fig. S9. The alary MN also expresses *dprs* and *DIPs*.**

Representative image showing *DIP-κ* expression in the alary MN. Alary MNs display features of excitatory MNs as they have DLG accumulation around boutons.

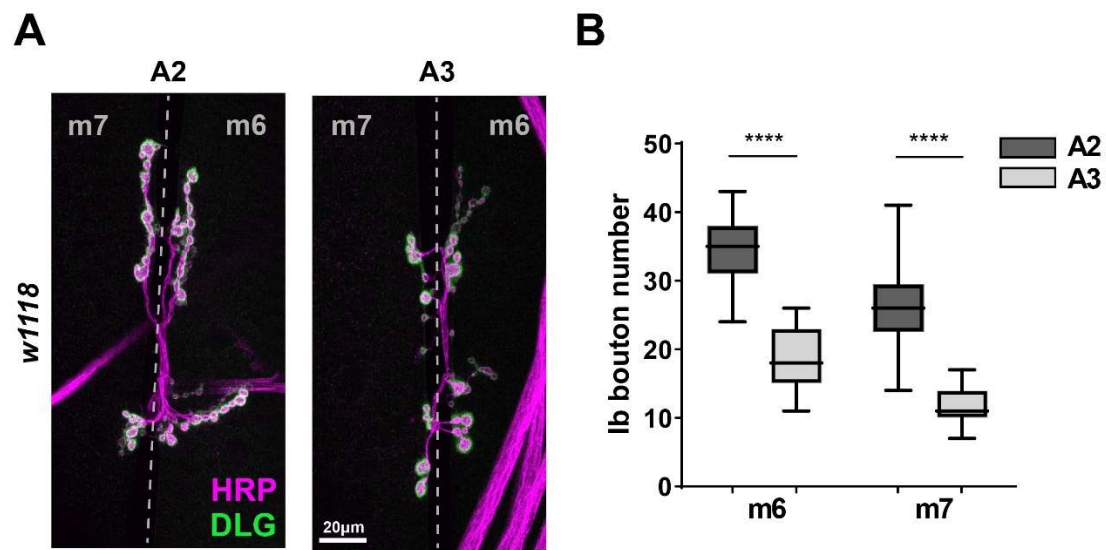

**Fig. S10. Larger NMJs on m6 and m7 in A2.**

A. Representative images showing larger type-Ib NMJs on m6 and m7 in A2 compared to A3.  
 B. Bouton number counts from m6 and m7 in A2 and A3 confirmed that A2 NMJs are double the size of A3 (n = 17 and 15 for A2 and A3, respectively, \*\*\*\*p<0.0001).

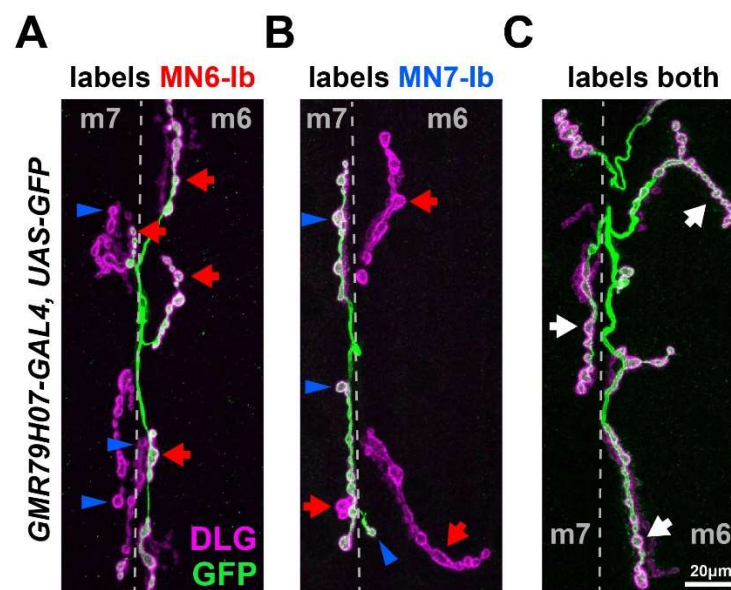

**Fig. S11. *GMR79H07-GAL4* randomly labels MN6-Ib and MN7-Ib.**

A previous study reported that *GMR79H07-GAL4* labels type-Ib NMJs on m6 in A2 (Aponte-Santiago et al., 2020). We crossed this driver to *UAS-GFP* and found inconsistent expression patterns since it (A) sometimes only labels MN6-Ib (red arrows), (B) sometimes only labels MN7-Ib (blue arrowheads), or (C) sometimes labels both MNs (white arrows). These expression patterns support the existence of MN6-Ib and MN7-Ib and their dual innervation properties.



**Table S1. *dpr/DIP-GAL4* lines information**

| GAL4 line         | GAL4 derived from  | Insertion site                | Genotype                                                                                       | Sources    |
|-------------------|--------------------|-------------------------------|------------------------------------------------------------------------------------------------|------------|
| <i>DIP-α-GAL4</i> | MI10680 (T2A-GAL4) | 6 <sup>th</sup> coding intron | <i>y<sup>1</sup> w<sup>+</sup> Mi{Trojan-GAL4.1}DIP-α<sup>MI10680-TG4.1</sup></i>              | GDP#       |
| <i>DIP-β-GAL4</i> | MI01971 (GT-GAL4)  | 5' UTR intron                 | <i>y<sup>1</sup> w<sup>+</sup> Mi{GT-GAL4}DIP-β<sup>MI01971-GAL4</sup></i>                     | (BL#90316) |
| <i>DIP-γ-GAL4</i> | MI03222 (GT-GAL4)  | 5' UTR intron                 | <i>Mi{GT-GAL4}DIP-γ<sup>MI03222-GAL4</sup></i>                                                 | (BL#90315) |
| <i>DIP-δ-GAL4</i> | MI08287 (T2A-GAL4) | 4 <sup>th</sup> coding intron | <i>Mi{Trojan-GAL4.1}DIP-δ<sup>MI08287-TG4.1</sup></i>                                          | (BL#90320) |
| <i>DIP-ε-GAL4</i> | MI11827 (T2A-GAL4) | 1 <sup>st</sup> coding intron | <i>Mi{Trojan-GAL4.1}DIP-ε<sup>MI11827-TG4.1</sup>/CyO,Dfd-YFP</i>                              | (BL#67502) |
| <i>DIP-ζ-GAL4</i> | MI03838 (T2A-GAL4) | 2 <sup>nd</sup> coding intron | <i>Mi{Trojan-GAL4.0}DIP-ζ<sup>MI03838-TG4.0</sup></i>                                          | (BL#90317) |
| <i>DIP-η-GAL4</i> | MI07948 (T2A-GAL4) | 4 <sup>th</sup> coding intron | <i>Mi{Trojan-GAL4.1}DIP-η<sup>MI07948-TG4.1</sup>/CyO,Dfd-YFP</i>                              | (BL#90318) |
| <i>DIP-θ-GAL4</i> | MI03191 (T2A-GAL4) | 2 <sup>nd</sup> coding intron | <i>Mi{Trojan-GAL4.1}DIP-θ<sup>MI03191-TG4.1</sup>/CyO,Dfd-YFP</i>                              | GDP#       |
| <i>DIP-ι-GAL4</i> | CR00997 (T2A-GAL4) | 1 <sup>st</sup> coding intron | <i>TI{CRIMIC-TG4.1}DIP-ι<sup>CR00997-TG4.1</sup></i>                                           | (BL#83243) |
| <i>DIP-κ-GAL4</i> | CR01146 (T2A-GAL4) | 1 <sup>st</sup> coding intron | <i>TI{CRIMIC-TG4.1}DIP-κ<sup>CR01146-TG4.1</sup>,Gpo3<sup>CR01114-TG4.1X</sup>/CyO,Dfd-YFP</i> | (BL#83252) |
| <i>DIP-λ-GAL4</i> | CR70096 (T2A-GAL4) | 2 <sup>nd</sup> coding intron | <i>TI{CRIMIC-TG4.0}DIP-λ<sup>CR70096-TG4.0</sup></i>                                           | This study |
| <i>dpr1-GAL4</i>  | MI12729 (T2A-GAL4) | 1 <sup>st</sup> coding intron | <i>Mi{Trojan-GAL4.1}dpr1<sup>MI12729-TG4.1</sup>/CyO,Dfd-YFP</i>                               | GDP#       |
| <i>dpr2-GAL4</i>  | MI05656 (T2A-GAL4) | 4 <sup>th</sup> coding intron | <i>Mi{Trojan-GAL4.1}dpr2<sup>MI05656-TG4.1</sup>/CyO,Dfd-YFP</i>                               | GDP#       |
| <i>dpr3-GAL4</i>  | MI05963 (T2A-GAL4) | 1 <sup>st</sup> coding intron | <i>Mi{Trojan-GAL4.1}dpr3<sup>MI05963-TG4.1</sup>/CyO,Dfd-YFP</i>                               | GDP#       |
| <i>dpr4-GAL4</i>  | CR00485 (T2A-GAL4) | 1 <sup>st</sup> coding intron | <i>TI{CRIMIC-TG4.1}dpr4<sup>CR00485-TG4.1</sup>/TM6,Sb,Hu,Dfd-YFP</i>                          | (BL#79271) |
| <i>dpr5-GAL4</i>  | MI11085 (T2A-GAL4) | 2 <sup>nd</sup> coding intron | <i>Mi{Trojan-GAL4.1}dpr5<sup>MI11085-TG4.1</sup></i>                                           | GDP#       |
| <i>dpr6-GAL4</i>  | MI01358 (T2A-GAL4) | 1 <sup>st</sup> coding intron | <i>Mi{Trojan-GAL4.1}dpr6<sup>MI01358-TG4.1</sup></i>                                           | GDP#       |
| <i>dpr7-GAL4</i>  | MI05719 (T2A-GAL4) | 1 <sup>st</sup> coding intron | <i>Mi{Trojan-GAL4.1}dpr7<sup>MI05719-TG4.1</sup></i>                                           | (BL#78385) |
| <i>dpr8-GAL4</i>  | MI11830 (T2A-GAL4) | 1 <sup>st</sup> coding intron | <i>Mi{Trojan-GAL4.1}dpr8<sup>MI11830-TG4.1</sup></i>                                           | This study |
| <i>dpr9-GAL4</i>  | MI03594 (T2A-GAL4) | 3 <sup>rd</sup> coding intron | <i>Mi{Trojan-GAL4.1}dpr9<sup>MI03594-TG4.1</sup></i>                                           | GDP#       |
| <i>dpr10-GAL4</i> | MI03557 (T2A-GAL4) | 1 <sup>st</sup> coding intron | <i>Mi{Trojan-GAL4.1}dpr10<sup>MI03557-TG4.1</sup></i>                                          | GDP#       |
| <i>dpr11-GAL4</i> | MI01743 (T2A-GAL4) | 1 <sup>st</sup> coding intron | <i>Mi{Trojan-GAL4.1}dpr11<sup>MI01743-TG4.1</sup></i>                                          | GDP#       |
| <i>dpr12-GAL4</i> | MI01695 (T2A-GAL4) | 1 <sup>st</sup> coding intron | <i>Mi{Trojan-GAL4.1}dpr12<sup>MI01695-TG4.1</sup>/CyO,Dfd-YFP</i>                              | GDP#       |
| <i>dpr13-GAL4</i> | MI05577 (T2A-GAL4) | 2 <sup>nd</sup> coding intron | <i>Mi{Trojan-GAL4.0}dpr13<sup>MI05577-TG4.0</sup>/CyO,actin-GFP</i>                            | This study |
| <i>dpr14-GAL4</i> | CR00516 (T2A-GAL4) | 1 <sup>st</sup> coding intron | <i>TI{CRIMIC-TG4.1}dpr14<sup>CR00516-TG4.1</sup></i>                                           | (BL#80586) |
| <i>dpr15-GAL4</i> | MI01408 (T2A-GAL4) | 3 <sup>rd</sup> coding intron | <i>Mi{Trojan-GAL4.1}dpr15<sup>MI01408-TG4.1</sup>/TM6,Sb,Hu,Dfd-YFP</i>                        | (BL#66827) |
| <i>dpr16-GAL4</i> | MI05173 (T2A-GAL4) | 1 <sup>st</sup> coding intron | <i>Mi{Trojan-GAL4.1}dpr16<sup>MI05173-TG4.1</sup></i>                                          | GDP#       |
| <i>dpr17-GAL4</i> | MI08707 (T2A-GAL4) | 1 <sup>st</sup> coding intron | <i>Mi{Trojan-GAL4.1}dpr17<sup>MI08707-TG4.1</sup>/TM6,Sb,Hu,Dfd-YFP</i>                        | (BL#76200) |
| <i>dpr18-GAL4</i> | CR01009 (T2A-GAL4) | 1 <sup>st</sup> coding intron | <i>TI{CRIMIC-TG4.1}dpr18<sup>CR01009-TG4.1</sup></i>                                           | (BL#83245) |
| <i>dpr19-GAL4</i> | CR00996 (T2A-GAL4) | 1 <sup>st</sup> coding intron | <i>TI{CRIMIC-TG4.1}dpr19<sup>CR00996-TG4.1</sup>/CyO,Dfd-YFP</i>                               | (BL#83242) |

GDP#: *Drosophila Gene Disruption Project*

**Table S2. mRNA level and primer information**

| Gene         | Tested Genotype                                                | (norm.) mRNA level | Primer              | Sequence                 |
|--------------|----------------------------------------------------------------|--------------------|---------------------|--------------------------|
| <i>DIP-α</i> | <i>DIP-α</i> <sup>MI10680-GAL4</sup>                           | 0.02±0.02          | <i>DIP-α-qPCR-F</i> | GGAGTACCGCCATCGGTCTC     |
|              |                                                                |                    | <i>DIP-α-qPCR-R</i> | GGCTTCGACGTGACACTCG      |
| <i>DIP-β</i> | <i>DIP-β</i> <sup>MI01971-GAL4</sup>                           | 0.55±0.11          | <i>DIP-β-qPCR-F</i> | GAGCACGTGGTCATCCGAAG     |
|              |                                                                |                    | <i>DIP-β-qPCR-R</i> | GGAGGCAATGCACATGTAGGC    |
| <i>DIP-γ</i> | <i>DIP-γ</i> <sup>MI03222-GAL4</sup>                           | 0.16±0.04          | <i>DIP-γ-qPCR-F</i> | GAGAGCCTCCGATCAGACCG     |
|              |                                                                |                    | <i>DIP-γ-qPCR-R</i> | CCTGCACATCGATAACAACCC    |
| <i>DIP-δ</i> | <i>DIP-δ</i> <sup>MI08287-GAL4</sup>                           | 0.35±0.16          | <i>DIP-δ-qPCR-F</i> | GGCAACTATCGATGCATCTCG    |
|              |                                                                |                    | <i>DIP-δ-qPCR-R</i> | GTCGTTGCGTGATGAGGGTATG   |
| <i>DIP-ε</i> | <i>DIP-ε</i> <sup>MI11827-GAL4</sup> / <i>CyO,Dfd-YFP</i>      | 0.20±0.06          | <i>DIP-ε-qPCR-F</i> | CGGCCAAGACCCAGTATGG      |
|              |                                                                |                    | <i>DIP-ε-qPCR-R</i> | GATTTTGTTGCCGTCATCGCG    |
| <i>DIP-ζ</i> | <i>DIP-ζ</i> <sup>MI03838-GAL4</sup>                           | 0.04±0.004         | <i>DIP-ζ-qPCR-F</i> | GTGGAAGCCACAGTCGGATTG    |
|              |                                                                |                    | <i>DIP-ζ-qPCR-R</i> | GAGGCAGTGGTTGGAGGATATG   |
| <i>DIP-η</i> | <i>DIP-η</i> <sup>MI07948-GAL4</sup> / <i>CyO,Dfd-YFP</i>      | 0.41±0.23          | <i>DIP-η-qPCR-F</i> | GGCAGTAACGTGACGCTCAAATG  |
|              |                                                                |                    | <i>DIP-η-qPCR-R</i> | CGAGGGAGGGACTCCATTGG     |
| <i>DIP-θ</i> | <i>FRT40A, DIP-θ</i> <sup>MI03191-GAL4</sup>                   | 0.08±0.10          | <i>DIP-θ-qPCR-F</i> | CTCCTGCAGAACGTAACGGTG    |
|              |                                                                |                    | <i>DIP-θ-qPCR-R</i> | GCGTGAGTTATGCTCATGCG     |
| <i>DIP-ι</i> | <i>DIP-ι</i> <sup>CR00997-GAL4</sup>                           | 0.89±0.20          | <i>DIP-ι-qPCR-F</i> | GGGATGCCCTACTCACGTGTG    |
|              |                                                                |                    | <i>DIP-ι-qPCR-R</i> | CATCCGCGATCCGATTCTG      |
| <i>DIP-κ</i> | <i>DIP-κ</i> <sup>CR011146-GAL4</sup> / <i>CyO,Dfd-YFP</i>     | 0.51±0.30          | <i>DIP-κ-qPCR-F</i> | GACACGCAGACGATCCTGTC     |
|              |                                                                |                    | <i>DIP-κ-qPCR-R</i> | CGTGTTCACTTGGCACATGTAC   |
| <i>DIP-λ</i> | <i>DIP-λ</i> <sup>CR70096-GAL4</sup>                           | 1.50±0.05          | <i>DIP-λ-qPCR-F</i> | CACCCACATGGTCTCACTAAATCC |
|              |                                                                |                    | <i>DIP-λ-qPCR-R</i> | CTCTGGATTATGTTCTGGGTGG   |
| <i>dpr1</i>  | <i>dpr1</i> <sup>MI12729-GAL4</sup> / <i>CyO,Dfd-YFP</i>       | 0.92±0.10          | <i>dpr1-qPCR-F</i>  | GAGCCCAAGATGTCCCTGTC     |
|              |                                                                |                    | <i>dpr1-qPCR-R</i>  | GAATATGTTGCCAGCTCGTGG    |
| <i>dpr2</i>  | <i>dpr2</i> <sup>MI05656-GAL4</sup> / <i>CyO,Dfd-YFP</i>       | 0.93±0.27          | <i>dpr2-qPCR-F</i>  | CGTCGGCGCAGGATATTGG      |
|              |                                                                |                    | <i>dpr2-qPCR-R</i>  | GATGACATTGACCACCACGCTG   |
| <i>dpr3</i>  | <i>dpr3</i> <sup>MI05963-GAL4</sup> / <i>CyO,Dfd-YFP</i>       | 0.55±0.24          | <i>dpr3-qPCR-F</i>  | GGACGCTGCATGTGAAGGC      |
|              |                                                                |                    | <i>dpr3-qPCR-R</i>  | GCCTTGAAGTGCAGATCGGG     |
| <i>dpr4</i>  | <i>dpr4</i> <sup>CR00485-GAL4</sup> / <i>TM6,Sb,Hu,Dfd-YFP</i> | 0.56±0.20          | <i>dpr4-qPCR-F</i>  | CGGATTCGGGCAACTACACG     |
|              |                                                                |                    | <i>dpr4-qPCR-R</i>  | GCACGGACGTGGATGAAAGG     |
| <i>dpr5</i>  | <i>dpr5</i> <sup>MI11085-GAL4</sup>                            | 0.13±0.02          | <i>dpr5-qPCR-F</i>  | CACGGAGCCCAAGATCAGTC     |
|              |                                                                |                    | <i>dpr5-qPCR-R</i>  | CGTGTCTTGTGCCACAGC       |
| <i>dpr6</i>  | <i>dpr6</i> <sup>MI01358-GAL4</sup>                            | 0.23±0.03          | <i>dpr6-qPCR-F</i>  | CCATCACCAGGACACGGAGG     |
|              |                                                                |                    | <i>dpr6-qPCR-R</i>  | GACACGCCGCCTCTTGATG      |
| <i>dpr7</i>  | <i>dpr7</i> <sup>MI05719-GAL4</sup>                            | 0.18±0.10          | <i>dpr7-qPCR-F</i>  | GCACAGCCAAGAGACAGTGG     |
|              |                                                                |                    | <i>dpr7-qPCR-R</i>  | GCCAGGGCAATAGTGCTATCCC   |
| <i>dpr8</i>  | <i>dpr8</i> <sup>MI11830-GAL4</sup> / <i>FM7,Dfd-YFP</i>       | 0.49±0.19          | <i>dpr8-qPCR-F</i>  | GAATTTGGGCAATCGCACG      |

|              |                                                    |           |                     |                         |
|--------------|----------------------------------------------------|-----------|---------------------|-------------------------|
| <i>dpr9</i>  | <i>dpr9</i> <sup>MI03594-GAL4</sup>                | 0.08±0.09 | <i>dpr8-qPCR-R</i>  | CGCAATGTCCAATCCTCGG     |
|              |                                                    |           | <i>dpr9-qPCR-F</i>  | GGGCGATACGACCACATCG     |
| <i>dpr10</i> | <i>dpr10</i> <sup>MI03557-GAL4</sup>               | 0.06±0.05 | <i>dpr9-qPCR-R</i>  | CTCCCCTGGAAACGGAATGG    |
|              |                                                    |           | <i>dpr10-qPCR-F</i> | GGGCTGTCGTGTCAAGCATC    |
| <i>dpr11</i> | <i>dpr11</i> <sup>MI01743-GAL4</sup>               | 0.30±0.06 | <i>dpr10-qPCR-R</i> | GCCCACTTGATCTGCAGGG     |
|              |                                                    |           | <i>dpr11-qPCR-F</i> | GTGTCCAGCTGCAAGTTGTGG   |
| <i>dpr12</i> | <i>dpr12</i> <sup>MI01695-GAL4/CyO,Dfd-YFP</sup>   | 0.82±0.05 | <i>dpr11-qPCR-R</i> | GGTTGGGATCCAGTTGCGTG    |
|              |                                                    |           | <i>dpr12-qPCR-F</i> | CGGCATGTACGAGTGCCAG     |
| <i>dpr13</i> | <i>dpr13</i> <sup>MI05577-GAL4/CyO,actin-GFP</sup> | 0.92±0.06 | <i>dpr12-qPCR-R</i> | CGTACTGCGGTGGTGTAGGAC   |
|              |                                                    |           | <i>dpr13-qPCR-F</i> | GTTTCAGTGCCACGCACTTGAAG |
| <i>dpr14</i> | <i>dpr14</i> <sup>CR00516-GAL4</sup>               | 0.04±0.02 | <i>dpr13-qPCR-R</i> | CAGCGTTGAACCTGGGGTTA    |
|              |                                                    |           | <i>dpr14-qPCR-F</i> | GGTGGTGCATGTGCTGAACG    |
| <i>dpr15</i> | <i>FRT82B, dpr15</i> <sup>MI01408-GAL4</sup>       | 0.57±0.09 | <i>dpr14-qPCR-R</i> | CACTTGTCCCAAGCCCAATCC   |
|              |                                                    |           | <i>dpr15-qPCR-F</i> | CCATTGTCTCCACGTGCTG     |
| <i>dpr16</i> | <i>dpr16</i> <sup>MI05173-GAL4</sup>               | 0.99±0.38 | <i>dpr15-qPCR-R</i> | CTTGTGGTGGCTTTGCTGGTG   |
|              |                                                    |           | <i>dpr16-qPCR-F</i> | CACTCCGGCAACTACACGTG    |
| <i>dpr17</i> | <i>FRT82B, dpr17</i> <sup>MI08707-GAL4</sup>       | 0.01±0.01 | <i>dpr16-qPCR-R</i> | CCCGTGACCCAGTCTGTGG     |
|              |                                                    |           | <i>dpr17-qPCR-F</i> | CGGCGCAACCTGACAATGC     |
| <i>dpr18</i> | <i>dpr18</i> <sup>CR01009-GAL4</sup>               | 0.33±0.11 | <i>dpr17-qPCR-R</i> | GCATGCGCACCCATGAAACG    |
|              |                                                    |           | <i>dpr18-qPCR-F</i> | GCCGTGTCGGTATGCTCAAG    |
| <i>dpr19</i> | <i>dpr19</i> <sup>CR00996-GAL41/Cyo,Dfd-YFP</sup>  | 0.55±0.13 | <i>dpr18-qPCR-R</i> | CGCCAATTGTTCCGGTACTGG   |
|              |                                                    |           | <i>dpr19-qPCR-F</i> | CCTGAATCCCTCGGTCAGTG    |
| <i>Rpl32</i> | ALL                                                |           | <i>dpr19-qPCR-R</i> | CATGGCCGCCGTTTTCTCAC    |
|              |                                                    |           | <i>Rpl32-qPCR-F</i> | ATGCTAAGCTGTGCGACAAATG  |
|              |                                                    |           | <i>Rpl32-qPCR-R</i> | GTTCGATCCGTAACCGATGT    |
